1 **Size reductions and genomic changes associated with harvesting within two generations in wild**  
2 **walleye populations**

3 Ella Bowles<sup>1\*</sup>, Kia Marin<sup>1,4</sup>, Stephanie Mogensen<sup>2</sup>, Pamela Macleod<sup>3</sup>, Dylan J. Fraser<sup>1</sup>

4 <sup>1</sup>Concordia University, 7141 Sherbrooke St. West, Montreal, QC, H4B 1R6; <sup>2</sup>University of Calgary, 2500

5 University Dr. NW, Calgary AB, T2N 1N4; <sup>3</sup>Cree Nation of Mistissini, 187 Main Street, Mistissini, QC,

6 G0W 1C0

7 \*corresponding author

8 \*Email: [bowlese@gmail.com](mailto:bowlese@gmail.com)

9

10

11

12

13

14

15

16

17

18

19

20

21

22

23

24

25

26 <sup>4</sup>Golder Associates, 7250, rue du Mile End, 3e étage, Montréal, Québec, H2R 3A4

27 **Abstract**

28           The extent and rate of harvest-induced genetic changes in natural populations may impact  
29 population productivity, recovery and persistence. While there is substantial evidence for phenotypic  
30 changes in harvested fishes, knowledge of genetic change in the wild remains limited, as phenotypic and  
31 genetic data are seldom considered in tandem, and the number of generations needed for genetic changes  
32 to occur is not well understood. We quantified changes in size-at-age, sex-specific changes in body size,  
33 and genomic metrics in three harvested walleye (*Sander vitreus*) populations and a fourth reference  
34 population with low harvest levels over a 15-year period in Mistassini Lake, Quebec. We also collected  
35 Traditional Ecological Knowledge (TEK) surrounding concerns about these populations over time. Using  
36 ~9000 SNPs, genomic metrics included changes in population structure, neutral genomic diversity,  
37 effective population size and signatures of selection. TEK revealed concerns about overall reductions in  
38 body size and number of fish caught. Smaller body size, smaller size-at-age, changing population  
39 structure (population differentiation within one river and homogenization between two others), and  
40 signatures of selection between historical and contemporary samples reflected coupled phenotypic and  
41 genomic change in the three harvested populations in both sexes, while no change occurred in the  
42 reference population. Sex-specific analyses revealed differences in both body size and genomic metrics  
43 but were inconclusive about whether one sex was disproportionately affected. Our results support that  
44 harvest-induced genetic changes can arise within 1-2.5 generations in long-lived wild fishes,  
45 demonstrating the need to investigate concerns about harvest-induced evolution quickly once they have  
46 been raised.

47

48 **Keywords:** walleye, *Sander vitreus*, harvesting, fisheries-induced-evolution, genomics, body size, size-  
49 at-age

50

51

## 52 **Introduction**

53 Harvesting of wild populations can affect growth, body-size, maturation and population  
54 productivity (Heino *et al.* 2013; Heino & Godø 2002; Hutchings 2005); but it can also alter genetic  
55 population structuring, reduce genetic diversity (primarily through reducing population size) and select  
56 for different genotypes that underlie phenotypic traits (the latter commonly referred to as fisheries-  
57 induced evolution, FIE) (Allendorf *et al.* 2008; Hutchings & Fraser 2008). Because harvest-induced  
58 genetic changes can affect population productivity, recovery and persistence, assessing how quickly, to  
59 what extent and under what circumstances such changes arise has become an emerging component of  
60 contemporary fisheries management (Heino *et al.* 2015; Jorgensen *et al.* 2007; Law & Grey 1989; Rowell  
61 1993).

62 Many studies have shown rapid phenotypic change towards smaller body size and size-at-age in  
63 harvested fish populations, though whether such changes are plastic responses (Law 2007), genetic  
64 changes or both is a source of ongoing debate (Heino *et al.* 2015; Jorgensen *et al.* 2007; Sharpe & Hendry  
65 2009). Much of the empirical evidence that fishing causes rapid, genetically-based phenotypic change  
66 comes from lab-based studies (e.g. within three generations (van Wijk *et al.* 2013), or two to five  
67 generations (Therkildsen *et al.* 2019; Uusi-Heikkilä *et al.* 2017)). However, lab environments can  
68 introduce unintended selection pressures (possibly body condition, growth, maturation, Uusi-Heikkilä *et*  
69 *al.* 2017) and may not adequately depict the actual extent or rate of harvest-induced change that wild  
70 fishes experience (Fraser *et al.* 2018). Results from the few studies that have integrated phenotypic and  
71 genetic evidence in the wild suggest that harvest-induced genetic change may occur within as little as one  
72 generation (Chebib *et al.* 2016), to four to eight (Allen *et al.* 2017), or longer (Hutchinson *et al.* 2003;  
73 Therkildsen *et al.* 2013), though these studies were based on relatively limited genetic data and/or did not  
74 consider sex. Indeed, how genetic change from fishing may differentially affect males and females is  
75 understudied in fishes, despite that in many species the sexes exhibit divergent, genetically-based life  
76 histories (Fraser *et al.* 2018), and that harvest may affect the sexes differently (Hixon *et al.* 2013;  
77 Hutchings & Rowe 2008; Philipp *et al.* 2015). Overall, there remains much to learn in nature about how

78 fishing may drive genetic changes in the life history (e.g. body size, size-at-age, by sex), and genetic  
79 characteristics (e.g. population structure, genetic diversity and composition) of wild populations.

80 While Western Scientific Methods (WSM) are most often used to inform fisheries management,  
81 inclusion of Traditional Ecological Knowledge (TEK) has become an integral complement to scientific  
82 knowledge for wildlife management and community-based conservation (Berkes *et al.* 2000; Fraser *et al.*  
83 2006; Polfus *et al.* 2016; Polfus *et al.* 2014). TEK is defined as the “cumulative body of knowledge,  
84 practice and belief, evolving by adaptive processes and handed down through generations by cultural  
85 transmission, about the relationship of living beings (including humans) with one another and with their  
86 environment” (Berkes *et al.* 2000). Importantly, TEK provides extensive location-specific knowledge, can  
87 detect changes in wildlife more quickly than WSM (Huntington 2011), and often provides increased  
88 knowledge of environmental linkages (Chapman 2007; Drew 2005).

89 Walleye (*Sander vitreus*) are important for commercial, sport and Indigenous subsistence  
90 fisheries across North America (Bozek *et al.* 2011; Hansen *et al.* 2015; Scott & Crossman 1979).  
91 Mistassini Lake in northern Quebec, Canada, is the province’s largest natural lake (161 km long, 2 335  
92 km<sup>2</sup>, 183 m maximum depth), is in Grand Council of the Crees land, *Eeyou Istchee*, and is considered to  
93 be largely pristine (minimal mining, forestry, development; no known invasive species) (Fraser *et al.*  
94 2006; Marin *et al.* 2017). The motivation behind this study was observations by Cree elders and fishers of  
95 reduced body size and catch rates in walleye populations in three of Mistassini Lake’s southern tributaries  
96 that are close to the community, and a desire by the community to determine if management actions were  
97 needed. We also studied a fourth river at the northeastern tip of the lake, where the population was  
98 perceived to be largely unaffected by fishing until very recently (~2015, TEK, see methods). Subsistence  
99 harvest takes place on the rivers during spawning in the spring, and walleye from different rivers  
100 comprise a mixed-population fishery in the lake during the summer, both recreationally and for  
101 subsistence (Table S1). However, recreational non-Cree fishers are only permitted to fish below the 51<sup>st</sup>  
102 parallel when they are without a Cree guide (Figure 1), fishing by Cree appears to be mostly in the south  
103 (Table 2), and the genetically-distinct populations that contribute most to the mixed summer fishery are

104 those from the rivers of concern (Dupont *et al.* 2007). Documented catch by non-Cree fishers without a  
105 guide has not increased between 1997 and 2015 (Table S1), but we do not have data on direct or latent  
106 mortalities due to local fishing derbies. In addition, the human population and the number of households  
107 in Mistissini almost doubled between 1997 and 2016 (Table S1). Cumulatively, this information indicates  
108 an increase in fishing pressure in the southern rivers.

109         Using tissue samples and body size measurements collected in 2002/03 (Dupont *et al.* 2007)  
110 (“historical”) and between 2015-2017 (“contemporary”), we tested the general hypothesis that harvesting  
111 over a period of 1-2.5 generations (based on ages of spawners in the southern rivers of Mistassini Lake  
112 (supplementary data, Dupont *et al.* 2007)) was sufficient to cause coupled phenotypic and genetic changes  
113 in wild walleye populations. Specifically, we predicted that, in association with recent, increased fishing  
114 effort in Mistassini Lake, the following should be evident within the southern, harvested rivers but not in  
115 the northern river with limited harvesting, when comparing contemporary versus historic samples. 1)  
116 Reduced body size (total length and mass). 2) Reduced size-at-age. 3) Changes to population structure  
117 such as collapsing/homogenization of between-river population structure. 4) Reductions in genetic  
118 diversity and effective population size. 5) Signatures of selection, with putatively selected loci related to  
119 growth, body size and/or maturation. 6) Greater reductions in body size, size-at-age and stronger  
120 signatures of selection in females than in males, as a sexually dimorphic species with larger females than  
121 males. As one of the relatively few studies incorporating genomic and phenotypic data in wild  
122 populations to date, and the first to show rapid genetic change in a long-lived species, this study could be  
123 used to inform population genomics parameters and monitoring practices for the sustainable harvest and  
124 management of other similar long-lived species.

125

## 126 **Materials and Methods**

### 127 *Fishing pressure, Traditional Ecological Knowledge*

128         Currently, there is no mechanism in place for indigenous fisheries to report the number of fish  
129 caught in Mistassini Lake. Thus, to establish trends in fishing pressure, fish abundance and body size, we

130 conducted semi-directed interviews as in Fraser et al. (2006) during February and July of 2018 with 17  
131 elders and fisherman (30 – 79 years of age, with 13 respondents > 40 years) (Table 2). Answers were not  
132 used for questions where respondents explicitly stated a lack of knowledge as per Gagnon and Berteaux  
133 (2009), and the frequency of respondents for a given answer has been provided, using the total number of  
134 respondents for that question as the denominator. In addition, we obtained census numbers for all people in  
135 the community close to the lake and the number of fish caught by non-Cree fishers for a subset of years  
136 (Table S1). Ethics certificate 30008247.

137 Rivers included in the study were Chalifour, Icon and Perch in the south and Takwa in the north.  
138 Communicated by two TEK respondents and incidentally by several Cree fishers and community members  
139 in 2017 and 2018, Takwa was perceived to be relatively unaffected by fishing until ~2015 when larger boat  
140 motors made access easier.

141

#### 142 *Fish sampling*

143 Fish were sampled during spawning (after ice-off: mid May in the south and early June in the north)  
144 at spawning rivers in 2002 and 2003 by Dupont et al. (2007) (historical), and in 2015, 2016 and 2017  
145 (contemporary) by us (see Table 1 for sample sizes). Sampling was collaborative with subsistence fishers  
146 for 2015 – 2017. Walleye were captured via angling using the same lures and a combination of boats and  
147 shore fishing, from the same locations within rivers, for both historical and contemporary sampling (Table  
148 1). Catch-per-unit-effort was not available for historic samples or collaborative sampling and is therefore  
149 not included here for contemporary sampling. After capture, fish were immediately placed in freshwater  
150 baths with aerators. From each walleye, we collected total and fork length ( $TL \pm 1$  mm), wet mass ( $\pm 50$  g),  
151 sex (M, F, U (unknown, either spawned out or premature)) and a tissue sample for genetics; otoliths were  
152 collected from a random subsample. Live walleye were returned to the water near the location of capture.  
153 Opercular bones were collected for aging for historic samples (Table 1); 2015 and 2017 otoliths were aged  
154 at the Wisconsin Cooperative Fishery Unit, US Geological Service, University of Wisconsin, Stevens Point,  
155 USA.

156

157 *Body size at spawning and size-at-age*

158 We modeled both body size (total length and mass) and size-at-age in this study because we had a  
159 far greater sample size for body size estimates than aged samples, and mass estimates had not been  
160 correlated to historic aged samples. Thus, evaluating body size allowed us to investigate changes in length  
161 and mass on a per-river, per-sex and per-year basis.

162

163 Body size

164 We used multiple regressions and ANOVA in R (R Core Team 2017) to test our prediction that  
165 body size of breeding adults had been reduced in southern rivers between 2002/03 and each 2015, 2016  
166 and 2017. Year was set as a factor. Error was normally distributed for total length (TL), and mass was log  
167 transformed to improve fit of the error term. Our full model for each TL and mass ( $Y_i$ ) included the  
168 following.

169

$$170 \quad Y_i = \beta_0 + \beta_1 Year_i + \beta_2 River_i + \beta_3 Sex_i$$
$$171 \quad + \beta_4 Year_i \times River_i + \beta_5 Year_i \times Sex_i + \beta_6 River_i \times Sex_i + \beta_7 Year_i \times River_i \times Sex_i + e_i$$

172

173 To determine the best model, we used backward step-wise model selection and AIC (Akaike 1974).  
174 Significance was detected at an alpha of 0.05 and all multi-comparison  $P$ -values were adjusted using the  
175 false discovery rate (FDR) method for 64 planned contrasts (Tables S3 and S5) (Benjamini and Hochberg  
176 1995).

177 There were insufficient samples collected across locations in 2002 and 2003 to use these years  
178 independently for body size analysis. Since no population genetic structure existed between 2002 and  
179 2003 within rivers (Dupont *et al.* 2007), they were combined for all analyses, and denoted as 2002/03. In  
180 addition, in 2017 we were unable to collect any female walleye from Perch River, nor a sufficient number

181 of female walleye in Icon River to be able to use them in length/mass models (see Table 1 for sample  
182 numbers).

183

#### 184 Size-at-age

185 To test our prediction of reduction in size-at-age in the southern populations relative to the  
186 northern one through time, we used a Bayesian hierarchical regression model. We used Bayesian as  
187 opposed to frequentist modelling to account for possible bias due to sampling gear, as well as small and  
188 variable sample sizes for aging structures across rivers. In addition, only total length was modeled  
189 because mass data were not included in the historical dataset containing age information. We assumed  
190 walleye total length (TL) was normally distributed such that:

191

$$192 \quad TL_i \sim \text{normal}(\mu_i, \sigma)$$

193

194 with shape parameters  $\mu_i$  and  $\sigma$  representing the mean and standard deviation for walleye total length,  
195 respectively. Mean total length for the  $i$ th walleye was then modelled using linear regression:

196

$$197 \quad \mu_i = \beta_0 + \beta_1 \text{Age}_i + \beta_2 \text{Location}_i + \beta_3 \text{History}_i + \beta_4 \text{Sex}_i + \beta_5 \text{History}_i \times \text{Location}_i$$

198

199 We used vague normal priors for all  $\beta$  coefficients and modelled hyperpriors for age and sex by river.  
200 Location (southern rivers vs northern river), and history (contemporary vs historic samples) were coded  
201 as categorical variables.

202 The Bayesian model was run using JAGS version 4.3.0 (Plummer 2003) in R, using *rjags* and  
203 *run.jags* (Denwood 2016). We described the posterior distribution for the model using four MCMC  
204 chains. Starting parameter values for each chain were jittered. Each chain took 20,000 samples of the  
205 posterior, thinned at a rate of 50. The adaption period was 1000 iterations, and a burn-in rate of 50% was  
206 used, for a total chain length of 2,050,00. We evaluated MCMC chain convergence by visual inspection



207 of trace-plots to assess mixing. Additionally, we ensured that each parameter had effective samples sizes  
208 >1,000 and that they passed the Gelman-Rubin diagnostic test with potential scale reduction factors  
209 (PSRF) <1.1 suggesting convergence on a common posterior mode (Gelman *et al.* 2013).

210

## 211 *Sequencing*

212 DNA was extracted using a modified Qiagen blood and tissue kit protocol (Qiagen Inc., Valencia,  
213 CA) (see Table 1 for sample sizes) and was sequenced using individual-based genotyping-by-sequencing  
214 (GBS). Libraries for Ion Proton GBS were prepared using the procedure described by Masher *et al.*  
215 (2013) at IBIS, Université Laval, Québec, Canada, with modifications described in Abed *et al.* (2018).  
216 Libraries were prepared for sequencing using an Ion CHEF, Hi-Q reagents and P1 V3 chips  
217 (ThermoFisher), and the sequencing was performed for 300 flows. Enzymes used to cleave the DNA were  
218 rare cutter *pst1* and frequent cutter *msp1*.

219 Single-nucleotide polymorphisms (SNPs) were determined from raw sequence reads using the  
220 *stacks* pipeline v1.45 (Catchen *et al.* 2013), and *de novo* sequence alignment, on the supercomputer  
221 Guillimin from McGill University, managed by Calcul Québec and Compute Canada. Pre-processing of  
222 fastq files was completed using fastQC (<https://www.bioinformatics.babraham.ac.uk/projects/fastqc/>) to  
223 assess read-quality before and after using cutadapt (Martin 2011) to trim any remaining adapters and  
224 remove sequences <50bp. Our *stacks* parameter optimization method was similar to Mastretta-Yanes *et al.*  
225 (2015), but we did not estimate error rate because we did not have enough positive controls to do so.  
226 Final *stacks* parameters included default settings with the following custom options: within  
227 `process_radtags`, 80bp trim-length; `ustacks`, SNP model, alpha = 0.1 for SNP calls, -m = 7; `cstacks`, -n = 3;  
228 `rxstacks`, log-likelihood cut-off = -30 for SNP calls; *populations*, log-likelihood cut-off of -30 for SNP  
229 calls, choose single SNP, maf = 0.01, -r = 0.8. We ran *populations* twice. First, we used the parameters  
230 listed here, and generated a blacklist of loci consisting of loci with  $F_{IS} < -0.3$ . We then re-ran *populations*  
231 with the same parameters listed here using this blacklist, with each  $p=6/8, 5/7$  and  $4/6$ . No negative  
232 controls produced *stacks*, and all positive controls assigned to the correct populations using Discriminant

233 Analysis of Principal Components (DAPC) analysis in Adegnet (Jombart 2008; Jombart *et al.* 2010).

234 After quality trimming and filtering, an average of 8457 high-quality SNPs were used to estimate

235 population structure, genetic diversity and effective population size ( $N_e$ ).

236

### 237 *Population structure*

238 To test our prediction that harvesting in the southern populations would change genetic

239 population structure, potentially homogenizing structure between southern rivers over time, we assessed

240 population structure using DAPC, ADMIXTURE (Alexander *et al.* 2009), and genetic distance ( $F_{ST}$ )

241 (using GenoDive and 999 permutations, Meirmans & Van Tienderen 2004; Weir & Cockerham 1984).

242 The optimal number of principal components (PCs) to retain for DAPC was determined using the xval

243 procedure, using  $n/3$  (recommended by the manual) as the maximum number of PCs allowable, and 500

244 replicates. The population grouping that best fit the data was assessed using Bayesian Information

245 Criterion (BIC) for DAPC, while for ADMXTURE analysis, we used cross validation (CV) and 500

246 bootstrap replications. Both analyses were completed at least four times using different bootstrap values

247 and numbers of replicates to ensure results were stable. Based on DAPC, it was clear that 28 individuals,

248 primarily sampled in Icon and Chalifour Rivers, were from different unsampled genetic source

249 populations. We removed these individuals, re-ran the populations module of stacks, and conducted all

250 subsequent analyses using this reduced dataset.

251

### 252 *Removing loci potentially under selection*

253 Global outlier loci (loci putatively under selection) were detected using PCAdapt (Luu *et al.*

254 2017), using the scree plot method to determine the best number of PCs ( $K$ ) to retain (Jackson 1993), and

255 Mahalanobis distance with  $\alpha = 0.1$  to determine outliers. PCAdapt does not use pre-defined

256 population structure, but instead ascertains structure based on PCA. The program detects outliers based on

257 how they relate to the structure of populations on the PCA (i.e., the distance between a point and a

258 distribution). After removing the outlier loci from the dataset, the effect of linkage disequilibrium (LD) on

259 population structure was assessed by finding markers that were in LD ( $r^2 = 0.7$ ) using plink v1.9 (Chang  
260 *et al.* 2015). We removed these markers ( $n = 507$ ) and re-analyzed population structure with DAPC. Since  
261 linked loci had no effect on structure, they were retained for all subsequent analyses. Genetic diversity,  
262  $F_{ST}$  and  $N_e$  analyses were completed both including and excluding global outlier loci – while there was  
263 little difference between results including or excluding outlier loci for genetic diversity and  $N_e$ , the  
264 magnitude of  $F_{ST}$  was greater with outlier loci included, and the conclusion changed in one case for  $F_{ST}$ .  
265 Thus, we have included only results for neutral loci here for these two metrics.

266

### 267 *Genetic diversity and $N_e$*

268 To test the prediction that genetic diversity and  $N_e$  were reduced over time in southern  
269 populations, genetic diversity estimates were obtained using the *populations* model of *stacks*, and per-  
270 generation  $N_e$  (5-7 year generation time) was estimated using the linkage disequilibrium method in  
271 NeEstimator v2.01 (Do *et al.* 2014).  $N_e$  estimates and confidence intervals were corrected for linkage by  
272 correcting for chromosome number according to Waples *et al.* (2016).

273

### 274 *Signatures of selection*

275 To test the prediction that signatures of selection would be most evident between timepoints  
276 within southern and not northern river(s), and that putatively selected loci would be associated with  
277 relevant biological processes, analyses to determine outlier loci were conducted with PCAadapt using the  
278 method described above. Analyses were conducted both for sexes combined and separately: (i) for all  
279 populations combined, (ii) for southern rivers only, and (iii) within each population. For all analyses,  
280 except when all populations and years were included, the *populations* module of *stacks* was re-run  
281 including only the populations and/or sexes that were being contrasted, specifying that loci had to be  
282 present in both populations (see Table S7 for sample sizes and numbers of loci in each analysis). For sex-  
283 based analysis of the full dataset including all rivers and years, loci were required to be present in 6 of 8  
284 populations.

285 To determine possible functions for outlier loci, for all within-river historic-contemporary  
286 contrasts for which there were outlier loci, FASTA files were blasted, mapped and annotated using  
287 blast2go (Götz *et al.* 2008). Default parameters were used with the following custom choices: proprietary  
288 cloudblast, fast-blast, UniProtKB/Swiss-Prot (Swissprot\_v5) database, blast e-value 1.0E-5, 10 blast hits,  
289 filtered GO by taxonomy taking only matches to animals (Metazoa).

290

## 291 **Results**

### 292 *Fishing pressure, Traditional Ecological Knowledge*

293 Of 17 elders and fishers, most reported reductions in the size and number of walleye caught in the  
294 lake (15 and 14 respondents respectively) within the last 5-20 years (Table 2). Eleven respondents  
295 expressed concerns directly about overfishing, fishing during spawning or taking of too many fish during  
296 spawning. There was no consistent change in the number of fish caught by non-Cree fishers between  
297 1997 and 2015 (virtually the same in 1997, 2011 and 2015, but 54% higher in 2003) (Table S1), but the  
298 community of Mistissini (3724 people in 2016) grew by ~29% between 1997 and 2011, and the  
299 population and number of households in the community increased by ~50% between 1997 and 2016  
300 (Table S1). In addition, while there is currently no data on the number of fishers in the community nor the  
301 proportion of the population that fishes, the majority of fishers (16/17) fished in the southern area of  
302 concern in the lake, more than double than in all other areas of the lake except Takwa River (where 9/17  
303 fishers fished) (Table 2).

304

### 305 *Body size at spawning and size-at-age*

#### 306 Body size

307 Our prediction that body size would be reduced in southern populations within a 1-2.5-generation  
308 period was supported. The main effects, year, river and sex all had a significant effect on total length and  
309 mass (Table 3), and the best-fit models for each TL and mass each contained a three-way interaction  
310 between year, sex and river. AIC was >10 better for the full model for TL and >6 better for mass. Both

311 regression models were significant (TL,  $R^2$  adj = 0.418,  $F_{27, 1486} = 41.24$ ,  $p < 0.001$ ; mass  $R^2$  adj = 0.3907,  
312  $F_{27, 1481} = 36.81$ ). Mean TL and mass decreased significantly for both sexes between 2002/03 and each of  
313 2015, 2016 and 2017 in the southern rivers (TL 7 – 21% and mass 22-47% reductions), except for Perch  
314 River males in two contrasts and Chalifour females in two contrasts. While there was no significant  
315 change between 2002/03 and each of 2016 and 2017 years for females in Chalifour, the trend in decline  
316 remained clear (Figure 2); lack of significance may relate to low female sample size in this river (Table  
317 1). Indeed, the trend for Chalifour females was particularly evident when contrasted to Takwa (the  
318 reference northern river), where mean sizes of fish were consistent across all sampling years. Finally, a  
319 sex-bias for more males than females being captured at spawning sites was consistent for all sampling  
320 years and for all rivers, including Takwa (Figure S1).

321

#### 322 Size-at-age

323 Our prediction that fish in the southern rivers would be smaller for their age through time was  
324 supported, although the reduction in size was small (See Table 4 for posterior means and 95% credible  
325 intervals). Overall, fish were larger in the southern than the northern river(s), over all rivers fish were 29.4  
326 mm larger contemporaneously than they were historically, and males were 48.2 mm smaller than females  
327 on average. Lastly, and the term that tested our hypothesis, fish in the southern rivers were 13.7 mm  
328 smaller relative to fish in the north in contemporary relative to historical samples.

329 All parameter estimates passed convergence checks. Each parameter had effective samples sizes  
330  $>1,000$  and passed the Gelman-Rubin diagnostic test with potential scale reduction factors (PSRF)  $<1.1$ ,  
331 suggesting convergence on a common posterior mode (Gelman et al. 2013).

332

#### 333 *Population structure*

334 Our prediction that population structure would change over time, possibly including  
335 homogenization of structure between southern rivers, was supported for Icon and Perch Rivers in two of  
336 the three analyses. Specifically, ADMIXTURE and  $F_{ST}$  analyses supported this prediction, while DAPC

337 did not. Using both DAPC and ADMIXTURE 3 populations best described the data ( $k = 3053.162$  and  
338  $CV = 0.421$  respectively) (Figure 1), but the difference between CV 2-4 was small for ADMIXTURE  
339 (CV of 2 = 0.423 and CV of 4 = 0.428). In the 3-population scenario, Icon and Perch grouped as a  
340 metapopulation and Chalifour and Takwa Rivers were independent, with 2002/03 and 2015 samples  
341 grouping together for each river. In a 4-population scenario, many Perch 2003 individuals showed a  
342 substantial fraction of loci that were different from the Icon-Perch group. Genetic differentiation by  $F_{ST}$   
343 mirrored what was evident in the  $K = 4$  scenario.  $F_{ST}$  showed weak differentiation between Perch and  
344 Icon in 2002/03 (Table 5), and then merged as a single metapopulation in 2015. At a within-population  
345 level, Chalifour River was differentiated between timepoints, Icon did not diverge between timepoints,  
346 Perch diverged marginally between timepoints, and Takwa did not diverge between timepoints. Given  
347 that  $k = 3$  was identified as the best structure overall, subsequent genetic diversity and  $N_e$  analyses were  
348 conducted using a meta-population structure for Icon-Perch, with Chalifour and Takwa identified  
349 separately, but years were defined as separate populations for temporal analysis.

350

### 351 *Genetic diversity and $N_e$*

352 Our prediction that genetic diversity and  $N_e$  would be reduced between historical and  
353 contemporary timepoints was not supported. Genetic diversity fell within a tight range for all populations  
354 over all years, ranging from 0.21 to 0.23, with the lowest and highest values being in the southern  
355 populations (Figure 3a). Confidence Intervals (CIs) overlapped between timepoints for  $H_E$  in Chalifour  
356 and Icon-Perch; there was a 4.9% loss in  $H_E$  in Takwa, though the reduced  $H_E$  still fell within the range of  
357 southern populations. Point estimates of  $N_e$  ranged from 1741 to 3146 individuals across all populations,  
358 with the lowest and highest values being in the northern population.  $N_e$  CIs also overlapped between  
359 timepoints in Chalifour and Icon-Perch Rivers, and the data suggested a doubling in  $N_e$  over time in  
360 Takwa River (Figure 3b). There were likely insufficient samples to accurately detect a difference between  
361 thousands of individuals (Nunziata & Weisrock 2018; Waples & Do 2010) however these results clearly  
362 show that all populations remained large (i.e.,  $N_e$  in the thousands).

363

364 *Signatures of selection*

365 Our prediction that signatures of selection would be present between historic and contemporary  
366 timepoints within southern rivers but not the northern river, with putatively selected loci related to  
367 growth, body size and/or maturation, was supported. Eleven to 263 loci were outliers (0.17-2.83%)  
368 (Figures 4a - b). Outliers were found in the global PCA that included all rivers and both timepoints, for  
369 each F/M together and F & M individually, and Perch 2003 clustered as a separate population. But  
370 removing these outliers did not change the population structure in most cases. On the contrary, when the  
371 southern rivers were analyzed as a unit (i.e., the south historic vs contemporary) and on their own (i.e.,  
372 each Chalifour and Icon-Perch historic vs contemporary years), for F/M combined and for each F & M  
373 separately, population structure existed between the two timepoints and removing outlier loci usually  
374 collapsed the population structure. Further, there was no population structure between timepoints in  
375 Takwa (and thus no outlier loci) (Figure 4c, Table S7 and figures S2-16). In sum, while there were  
376 outliers separating north from south, outlier SNPs disproportionately contributed to the PCs between  
377 years in the southern subset. In addition, the greatest proportion of outlier SNPs found in each  
378 historic/contemporary PCA in the south maintained population structure between years (Figure 4c).  
379 Lastly, parallel outliers existed between the southern rivers (Figure 4d); of note, more outliers were in  
380 common between Icon-Perch F and Chalifour M (18 outliers) than between Icon-Perch F and Chalifour F  
381 (0) or Chalifour M and F (3).

382 Sex-specific analyses provided greater resolution than with sexes combined (Figures 4c and d).  
383 For example, outlier SNPs maintained population structure between timepoints in more of the southern  
384 rivers in sex-specific rather than combined analyses (Table S7, Figures S2-7). In addition, there was no  
385 population structure in Icon-Perch males, but there was in females (Figures 4c and S12-13). Lastly, the  
386 number of outliers in common between rivers differed between the sexes (Figure 4d), though this may be  
387 due in part to the number of individuals sequenced.

388           Blasts were conducted for southern (F/M combined and separately), Chalifour (F/M combined  
389 and separately), and Icon-Perch F (no outliers were found for Icon-Perch M or Takwa) Rivers. Southern  
390 F/M combined and M had no blast hits. Otherwise, between 2 and 6 alleles were annotated for each blast.  
391 Because annotations were completed against all mapped Metazoa, at level 2 go-annotation, functional  
392 annotations included many different biological processes, molecular functions and cellular components.  
393 Three relevant processes indicated were growth, metabolism and developmental process (Table S8).

394

## 395 **Discussion**

396           We detected rapid genetic changes associated with harvesting wild populations of walleye within  
397 1-2.5 generations, a shorter timescale than previously observed in other fisheries. Concurrent with  
398 reductions in body size within a 15-year period (2002/03 – 2017) (Figure 2), we detected a reduction in  
399 size-at-age (Table 4), genomic change evidenced by changing genomic population structure (Figure 1,  
400 Table 5) and putative signatures of selection within rivers (Figure 4), both with sexes combined and  
401 separately. These changes were present in the southern rivers most-impacted by increased fishing pressure  
402 by Cree and non-Cree fishers alike (Tables 2 and S1), and not in the northern river where there were  
403 fewer boats and fishers. Importantly, not only is fishing pressure greatest in the south, but southern fish  
404 from the affected spawning runs remain close to those spawning runs in the summer mixed population  
405 fishery (Dupont *et al.* 2007). A genetic drift hypothesis could posit that the observed genomic changes are  
406 stochastic. However, all of the observed populations had large  $N_e$ , making it unlikely that drift caused the  
407 phenotypic or genetic changes observed. The difference between neutral and adaptive genomic results,  
408 however, illustrates the capacity for genetically-large populations in nature to rapidly respond to harvest-  
409 induced selective pressures.

410           Reductions in body size (or trends indicating such reductions) were consistent between 2002/03  
411 and each of 2015 – 2017 within all southern rivers, except for Perch River male body size (Figure 2);  
412 moreover, size-at-age was reduced in the south over time (Table 4). In fact, size reductions in all southern  
413 rivers were likely underestimates of the true change. Namely, 2016 monitoring was largely collaborative;



414 approximately 48% of all sampled walleye (216 of 446) were harvested and donated by fishers. Donated  
415 2016 walleye were 639 g (stderr  $\pm$  21 mm) and 424 mm (stderr  $\pm$  4 mm) on average compared to 603 g  
416 (stderr  $\pm$  20 g) and 410 mm (stderr  $\pm$  4 mm) from our caught and released 2016 walleye (note that  
417 sampling was not collaborative in this way in 2002/03). Lastly, given that Perch River males were  
418 smaller than females, it is less likely that they would be subject to size-selective harvesting. In sum, these  
419 results support the idea that fishers often target larger fish, and this type of size-selective harvesting has  
420 been documented to lead to the evolution of smaller body size (Heino *et al.* 2015; Hutchings 2005; Swain  
421 *et al.* 2007).

422 Genomic change occurred between timepoints in the southern Rivers but not in the northern river.  
423 Population structure was homogenized over time between Icon and Perch Rivers. Signatures of selection  
424 were evident within southern Rivers: rivers were genetically differentiated between years (Table 5),  
425 outlier loci maintained that structure (Figure 4, Table S7), and exploratory analysis revealed relevant  
426 biological functions associated with a small number of those outlier loci (Table S8). In addition, although  
427 the extent of parallelism in events of natural selection is variable (Oke *et al.* 2017), parallel outlier loci  
428 were detected between timepoints in the southern rivers (Figure 4c). However, genomic change was  
429 clearly nascent. Neutral genetic diversity did not change between timepoints. Differences between the  
430 preferred population structures in ADMIXTURE were small (Figure 1).  $F_{ST}$  within rivers between years  
431 and between Icon and Perch 2015 were small (Table 5), and scree plots for outlier locus detection showed  
432 weak structure in two cases (Figures S9 and S12). Nonetheless, results were generally consistent when  
433 sexes were analyzed together and separately; although congruent with reductions in body size between  
434 2002/03 and 2015 in Perch River, genetic structure was present between timepoints in Icon-Perch females  
435 but not males (Figure 4).

436 Alternative explanations for the genomic change evident in Icon-Perch include sampling bias,  
437 spatial movement, or increased gene flow. If sampling bias was present, Perch 2003 individuals could  
438 have been from a different population, but 2002/03 were genetically indistinct within rivers (Dupont *et al.*  
439 2007), and Perch 2003 grouped with 2015 samples by DAPC. Alternatively, Perch 2003 individuals that

440 were different historically could have moved to a different spawning location in later years (Bigrigg  
441 2008), though Mistassini Lake populations generally have strong spawning site fidelity (Dupont *et al.*  
442 2007). Another possibility is that individuals from Icon River could be using Perch River to spawn much  
443 more now than historically, either replacing genotypes that have been fished out, or increasing gene flow  
444 substantially (Allendorf *et al.* 2008). Although the observed neutral and putatively selective genomic  
445 change in Icon-Perch is rapid, it is not without precedent (3 generations or less, Chebib *et al.* 2016; van  
446 Wijk *et al.* 2013), and even though these are genetically large populations (Figure 3a), rapid adaptation is  
447 possible via soft sweeps (Hermisson 2005; Messer & Petrov 2013). In sum, nascent genomic change  
448 occurred within a 12-year period (genomic samples were 2003 and 2015) within the southern most-  
449 harvested rivers, which represents 1-2.5 generations maximum.

450 Our data are consistent with rapid genetic changes to population structure and genetically-based  
451 phenotypes due to harvest, but alternative explanations must be explored. The observed reduction in size-  
452 at-age in the south was small relative to the overall change in body size between historical and  
453 contemporary samples, and may be due to a difference in aging structures used (historical using opercula,  
454 contemporary using otoliths) (Faust & Scholten 2017). However, ages calculated using opercula and  
455 otoliths have been highly correlated in walleye (Geisler 2012), and opercula have been validated to the  
456 age of 16 in walleye (94% of aged fish in Mistassini were < 16) (Faust & Scholten 2017).

457 Another alternative could be that the large body size changes are entirely plastic due to changes in  
458 the environment or a habitat shift unrelated to fishing. However, climate change is expected to warm the  
459 Mistassini region; as a cold oligotrophic lake, Mistassini is not ideal habitat for walleye, which prefer  
460 mesotrophic lakes (Kitchell *et al.* 1977; Niemuth *et al.* 1972). Climate warming is expected to increase  
461 the growing season length for walleye, and thus in the absence of fishing an increase in body size is a  
462 more likely response with climate warming than a decrease. Regarding plasticity, growing degree day  
463 (GDD) was shown to account for 96% of the variation in length of immature walleye over 416  
464 populations in Ontario and Quebec, though variation in growth associated with food availability was also  
465 evident (Neuheimer & Taggart 2007; Venturelli *et al.* 2010). Thus, although it is unlikely that all

466 observed changes are due to selection, smaller body size at spawning and smaller size-at-age could  
467 indicate that fish are selectively growing slower (Enberg *et al.* 2012).

468 Under variable recruitment (Bozek *et al.* 2011; Hansen *et al.* 1998), fish captured in 2002 and  
469 2003 could represent distinct, strong year classes, biasing estimates of mean size and contributing to  
470 temporal genetic differences. However, there was no genetic differentiation within rivers between 2002  
471 and 2003 (Dupont *et al.* 2007), Takwa River walleye had consistent body size in all years sampled, and  
472 we found a significant reduction in size-at-age in the southern rivers.

473 We estimated the selective pressure required to generate the observed changes in body size within  
474 1-2.5 generations to assess whether they were biologically plausible using the breeders equation ( $R = h^2S$ ,  
475 where  $R$  = response to selection,  $h^2$  = heritability,  $S$  = selection differential). Using averages for 11-year  
476 old walleye in the south for each 2002 (515 mm) and 2015 (424 mm) (a 13-year interval),  $R = -7$  mm per  
477 year. Given realistic  $h^2$  estimates (0.3) (Law 2000; Nussle *et al.* 2009), if observed changes were entirely  
478 due to selection,  $S$  would need to be -23 mm per year. Our Bayesian model held all variables constant  
479 when assessing the size change associated with harvest, and in so doing found that the size change  
480 attributed to selection was smaller than what is shown here. Thus, it is very likely that some of the  
481 observed body size change was plastic and/or due to stochasticity in addition to selection pressure.

#### 482 *Conclusions and management implications*

483 We have presented coupled phenotypic and genetic evidence consistent with fisheries-induced  
484 genetic changes within 1-2.5 generations in wild walleye populations; with rare comprehensive evidence,  
485 this study sets a precedent for the timeframe needed for investigating concerns regarding harvest-induced  
486 evolution in fisheries. Furthermore, sex-specific dynamics for both body size and genomics herein  
487 highlight the importance of collecting sex-specific data.

488 Our study illustrates the power of integrating life history and genomics methods for conservation  
489 in order to understand the factors affecting population change (Bernatchez *et al.* 2017), of integrating  
490 these with TEK, and of iterative population monitoring practices (Flanagan *et al.* 2018); i.e., this study

491 would not have been possible without the historic data. Considerations for Cree management could  
492 include that observed phenotypic and genetic changes may cause reduced productivity (Allendorf *et al.*  
493 2008; Hutchings 2005), and that genomic change is clearly nascent here. Depending on the severity of  
494 harvest (which is not precisely known in this case) and life-history (Audzijonyte & Kuparinen 2016),  
495 fisheries-induced changes may be reversed in 9 generations (Conover *et al.* 2009) or less (Feiner *et al.*  
496 2015) if fishing is halted.

497

498 **Data accessibility:** Supporting data are available on Dryad: to be completed after the manuscript has  
499 been accepted for publication.

500 **Competing interests:** The authors declare no competing interests.

501 **Acknowledgements:** We thank many people who contributed to this work. PP Dupont and L Bernatchez  
502 generously shared their historical tissue samples and length weight data. JP Coon-Come, D Schecapio, E  
503 Coon-Come and D Petawabano were excellent Cree guides. M Rabbitskin, our interpreter, and 17  
504 anonymous Cree fishers and elders shared their knowledge of the species and the lake. R Arax  
505 Koumrouyan helped conduct the blast2go analysis. M Yates, E Lawrence, J-M Matte, A Prevost, N Hill,  
506 A Harbicht, B Brookes, P Peres-Neto, A Cantin, K Wilson, B Allen, W Larson, Z Feiner and D Isermann  
507 contributed critical feedback and discussion throughout the project and/or on drafts of the article. M Dunn  
508 facilitated engagement with Niskamoon Corporation. This project was funded by fisheries monitoring  
509 grants from Niskamoon Corporation to EB/DJF/PM, and by a Mitacs Elevate Postdoctoral Fellowship to  
510 EB.

511

512 **Tables**

513 **Table 1:** Details of sample sizes for walleye caught in each tributary of Mistassini Lake for each sex and  
 514 year for each analysis, as well as whether samples were caught from a boat or on shore.

| River            | Year | Boat or shore fishing | Body size (2002/03 samples grouped)^ | Size-at-age  | Genomic after removing aberrant individuals (only 2003 and 2015 samples used)* |
|------------------|------|-----------------------|--------------------------------------|--------------|--------------------------------------------------------------------------------|
| <b>Chalifour</b> | 2002 | ‡primarily boat       |                                      | 21(M), 11(F) |                                                                                |
|                  | 2003 | ‡primarily boat       | 164(M), 14(F)                        |              | 22(M), 8(F)                                                                    |
|                  | 2015 | primarily boat        | 118(M), 14(F), 44(U)                 | 18(M), 3(F)  | 39(M), 9(F), 1(U)                                                              |
|                  | 2016 | primarily boat        | 132(M), 29(F), 2(U)                  |              |                                                                                |
|                  | 2017 | primarily boat        | 96(M), 12(F), 9(U)                   | 10(M), 4(F)  |                                                                                |
| <b>Perch</b>     | 2002 | not available         |                                      | 17(M), 37(F) |                                                                                |
|                  | 2003 | not available         | 113(M), 43(F)                        |              | 24(M), 24(F)                                                                   |
|                  | 2015 | primarily boat        | 34(M), 13(F), 13(U)                  | 3(M), 3(F)   | 31(M), 11(F)                                                                   |
|                  | 2016 | primarily shore       | 78(M), 26(F), 9(U)                   |              |                                                                                |
|                  | 2017 | primarily shore       | 12(M)                                |              |                                                                                |
| <b>Icon</b>      | 2002 | not available         |                                      | 27(M), 34(F) |                                                                                |
|                  | 2003 | not available         | 77(M), 43(F)                         |              | 23(M), 24(F)                                                                   |
|                  | 2015 | primarily shore       | 106(M), 8(F)                         | 13(M), 3(F)  | 37(M), 7(F)                                                                    |
|                  | 2016 | primarily shore       | 156(M), 13(F), 1(U)                  |              |                                                                                |
|                  | 2017 | primarily shore       | 38(M), 1(F), 1(U)                    |              |                                                                                |
| <b>Takwa</b>     | 2002 | ‡primarily boat       |                                      | 28(M), 15(F) |                                                                                |
|                  | 2003 | ‡primarily boat       | 64(M), 81(F), 26(U)                  |              | 17(M), 16(F), 2(U)                                                             |
|                  | 2015 | boat                  | 116(M), 15(F), 19(U)                 | 10(M), 11(F) | 20(M), 19(F)                                                                   |
|                  | 2016 | boat                  |                                      |              |                                                                                |
|                  | 2017 | boat                  | 51(M), 22(F), 76(U)                  |              |                                                                                |

‡Takwa and Chalifour spawning grounds are only accessible by boat; thus, while we do not have record of exactly how fishing was conducted, boat can be inferred

^Individuals with unknown sex were not used in body size models, and nor were categories with any fewer than 8 observations

\*We extracted DNA from 371 walleye (historical n = 173 from 2003, contemporary n = 198 from 2015), and that Icon and Perch were analyzed as a single population

516 **Table 2:** TEK for 17 fishers with >25 years of walleye fishing experience on Mistassini Lake. No. is the  
 517 number of respondents for that answer, and Freq is the frequency of respondents using the number of  
 518 respondents for the observation as the denominator. Frequency is not given for the observation for which  
 519 respondents could respond for multiple trends.

| Observation                             | Trend                                                      | Timeline of observation | No. | Freq |
|-----------------------------------------|------------------------------------------------------------|-------------------------|-----|------|
| Area fished                             | Region close to community                                  | Current time            | 16  | 0.94 |
|                                         | Far northeast, close to northern reference river           | Current time            | 9   | 0.53 |
|                                         | Other areas of the lake                                    | Current time            | ≤7  | 0.41 |
| Size of fish                            | Smaller                                                    | 5 - 25 yrs              | 12  | 0.71 |
|                                         | Smaller in the south                                       | 15 years                | 3   | 0.18 |
|                                         | No change in average, but Takwa River fish are smaller     | 5yrs                    | 1   | 0.06 |
|                                         | Different sizes in different seasons                       | within years            | 1   | 0.06 |
| Abundance of walleye                    | Decreasing                                                 | 5 - 25yrs               | 13  | 0.76 |
|                                         | Fewer in the south but not in the north                    |                         | 1   | 0.06 |
|                                         | No change                                                  | n/a                     | 1   | 0.06 |
|                                         | Does not know                                              | n/a                     | 2   | 0.12 |
| Other concerns about health of walleye  | Fishing during spawning or taking too many during spawning |                         | 6   |      |
|                                         | Use of snares to fish in the spring                        |                         | 3   |      |
|                                         | Night fishing, taking too many                             |                         | 2   |      |
|                                         | Overfishing                                                |                         | 5   |      |
|                                         | Damage to fish after being handled                         |                         | 1   |      |
|                                         | Fishing derby's causing many dead fish                     |                         | 2   |      |
|                                         | Pike are after walleye eggs                                |                         | 2   |      |
|                                         | Pollution in lake, dirty water                             |                         | 2   |      |
| No other concerns, or they will be fine |                                                            | 8                       |     |      |

520

521

522 **Table 3:** Analysis of variance table for best fit (full) model for each walleye total length (TL) and mass,  
 523 with response log(mass). Years are each 2002/03, 2015, 2016 and 2017. Rivers are Chalifour, Icon, Perch  
 524 and Takwa.

| <b>TL</b>             | <b>Df</b> | <b>Sum Sq</b> | <b>Mean Sq</b> | <b>F value</b> | <b>P</b> |
|-----------------------|-----------|---------------|----------------|----------------|----------|
| <b>Year</b>           | 3         | 656921.887    | 218973.962     | 111.058        | 0.000    |
| <b>River</b>          | 3         | 393310.528    | 131103.509     | 66.492         | 0.000    |
| <b>Sex</b>            | 1         | 860350.946    | 860350.946     | 436.347        | 0.000    |
| <b>Year:River</b>     | 8         | 199492.923    | 24936.615      | 12.647         | 0.000    |
| <b>Year:Sex</b>       | 3         | 9581.311      | 3193.770       | 1.620          | 0.183    |
| <b>River:Sex</b>      | 3         | 36772.902     | 12257.634      | 6.217          | 0.000    |
| <b>Year:River:Sex</b> | 6         | 39265.708     | 6544.285       | 3.319          | 0.003    |
| <b>Mass</b>           | <b>Df</b> | <b>Sum Sq</b> | <b>Mean Sq</b> | <b>F value</b> | <b>P</b> |
| <b>Year</b>           | 3         | 30.776        | 10.259         | 91.847         | 0.000    |
| <b>River</b>          | 3         | 23.854        | 7.951          | 71.189         | 0.000    |
| <b>Sex</b>            | 1         | 38.923        | 38.923         | 348.478        | 0.000    |
| <b>Year:River</b>     | 8         | 11.978        | 1.497          | 13.405         | 0.000    |
| <b>Year:Sex</b>       | 3         | 1.025         | 0.342          | 3.060          | 0.027    |
| <b>River:Sex</b>      | 3         | 2.461         | 0.820          | 7.345          | 0.000    |
| <b>Year:River:Sex</b> | 6         | 1.996         | 0.333          | 2.979          | 0.007    |

525

526



527 **Table 4:** Posterior means (PM) and 95% credible intervals (CI) for walleye size-at-age model for total  
528 length (in mm). Age is the effect of each year on length, location is south versus north and history is  
529 contemporary versus historical.

| <b>Parameter</b> | <b>Parameter</b>   | <b>PM (mm)</b> | <b>95% CI</b> | <b>Percent of the posterior mass below 0</b> |
|------------------|--------------------|----------------|---------------|----------------------------------------------|
| $\beta_0$        | Intercept          | 463.8          | 418.7-506.4   | 0%                                           |
| $\beta_1$        | Age                | 10.8           | 8.6-12.9      | 0%                                           |
| $\beta_2$        | Location           | 27.8           | -9.7-80.4     | 6%                                           |
| $\beta_3$        | History            | -29.4          | -50.0- -9.3   | 100%                                         |
| $\beta_4$        | Sex                | -48.2          | -65.6- -32.6  | 100%                                         |
| $\beta_5$        | History x Location | -13.7          | -37.1-9.6     | 87%                                          |

530

531

532 **Table 5.**  $F_{ST}$  differentiation for walleye within and between rivers for each year sampled.  $F_{ST}$  estimates  
 533 are below the diagonal, and  $p$ -values are above the diagonal, with a “\*” indicating  $p \leq 0.001$ .

|                | <b>Cha<br/>2003</b> | <b>Cha<br/>2015</b> | <b>Ico<br/>2003</b> | <b>Ico<br/>2015</b> | <b>Per<br/>2003</b> | <b>Per<br/>2015</b> | <b>Tak<br/>2003</b> | <b>Tak<br/>2015</b> |
|----------------|---------------------|---------------------|---------------------|---------------------|---------------------|---------------------|---------------------|---------------------|
| <b>Ch 2003</b> | --                  | *                   | *                   | *                   | *                   | *                   | *                   | *                   |
| <b>Ch 2015</b> | 0.004               | --                  | *                   | *                   | *                   | *                   | *                   | *                   |
| <b>Ic 2003</b> | 0.02                | 0.017               | --                  | 0.361               | *                   | 0.042               | *                   | *                   |
| <b>Ic 2015</b> | 0.02                | 0.016               | 0                   | --                  | 0.013               | 0.895               | *                   | *                   |
| <b>Pe 2003</b> | 0.019               | 0.019               | 0.002               | 0.001               | --                  | 0.042               | *                   | *                   |
| <b>Pe 2015</b> | 0.021               | 0.017               | 0.001               | 0                   | 0.001               | --                  | *                   | *                   |
| <b>Ta 2003</b> | 0.053               | 0.049               | 0.072               | 0.07                | 0.075               | 0.073               | --                  | 0.05                |
| <b>Ta 2015</b> | 0.057               | 0.053               | 0.077               | 0.076               | 0.078               | 0.078               | 0.001               | --                  |

534

## Figures

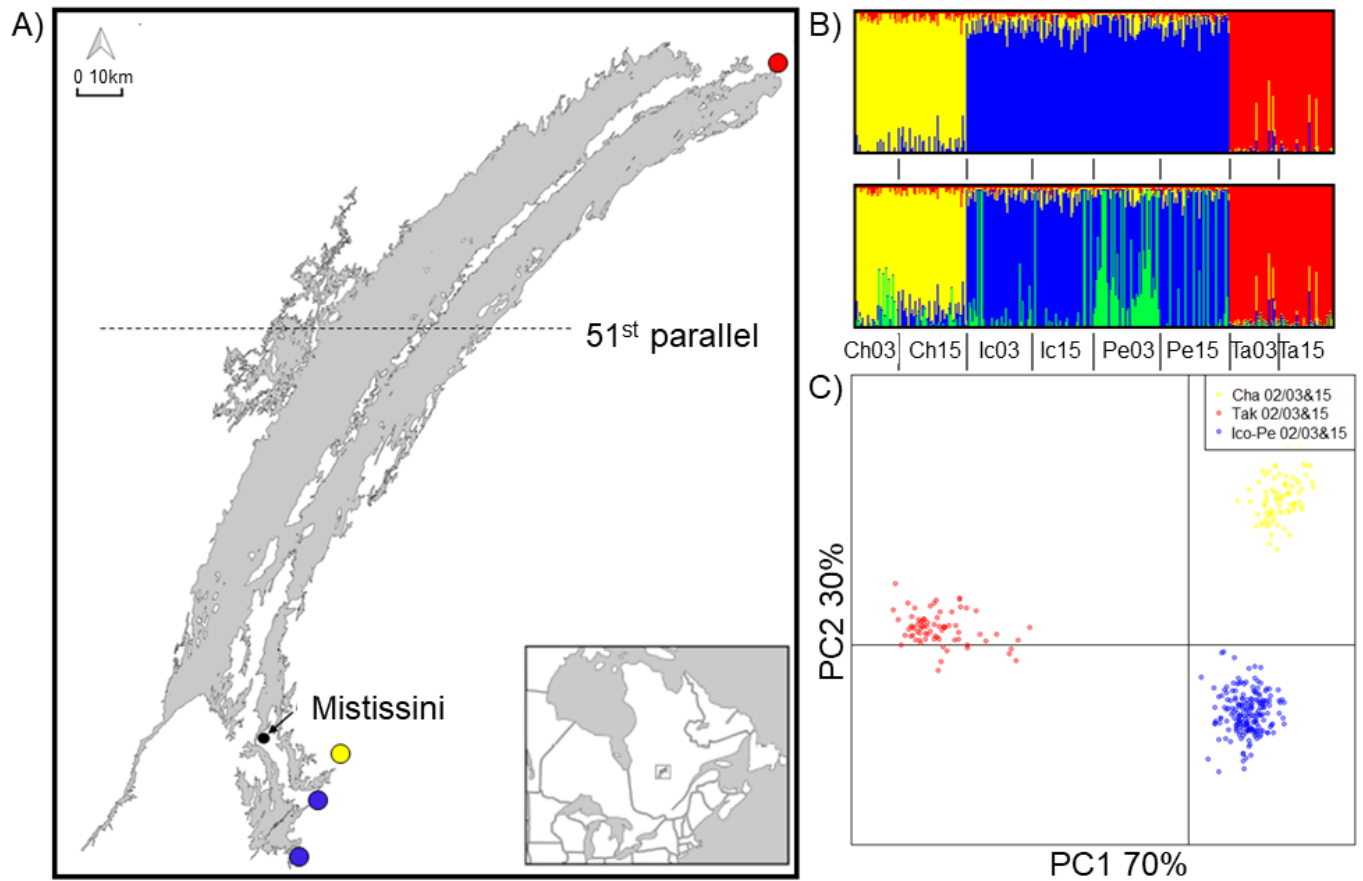

**Figure 1.** A) Map of sampling sites: red is Takwa River, blue is Icon and Perch Rivers, green is an historical genotype in Perch River, yellow is Chalifour River. B) ADMIXTURE results showing, top to bottom,  $K = 3$  and  $4$ . C) DAPC analysis showing  $k = 3$  (i.e., historical and contemporary sampling years are not separated statistically by DAPC).

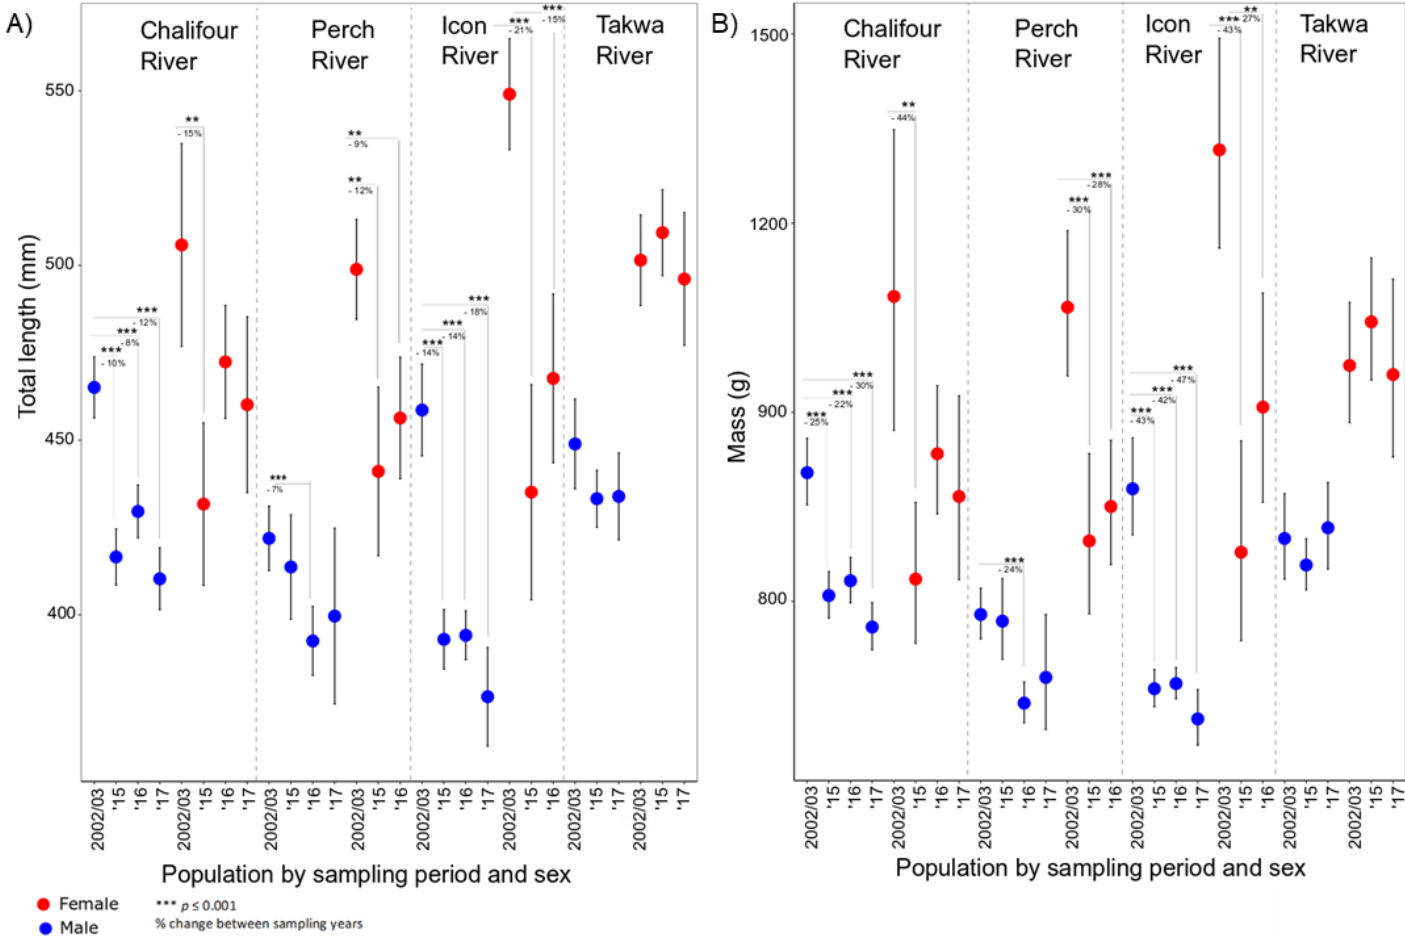

**Figure 2:** Least squares means ( $\pm$  95% CI) of A) total length and B) mass for male and female walleye between 2002/03, 2015, 2016 and 2017 in the four rivers surveyed. There was also a significant change between 2016 and 2017 ( $p = 0.0092$  for TL and  $p = 0.003$  for mass) for male fish in Chalifour, but this was not shown for clarity.

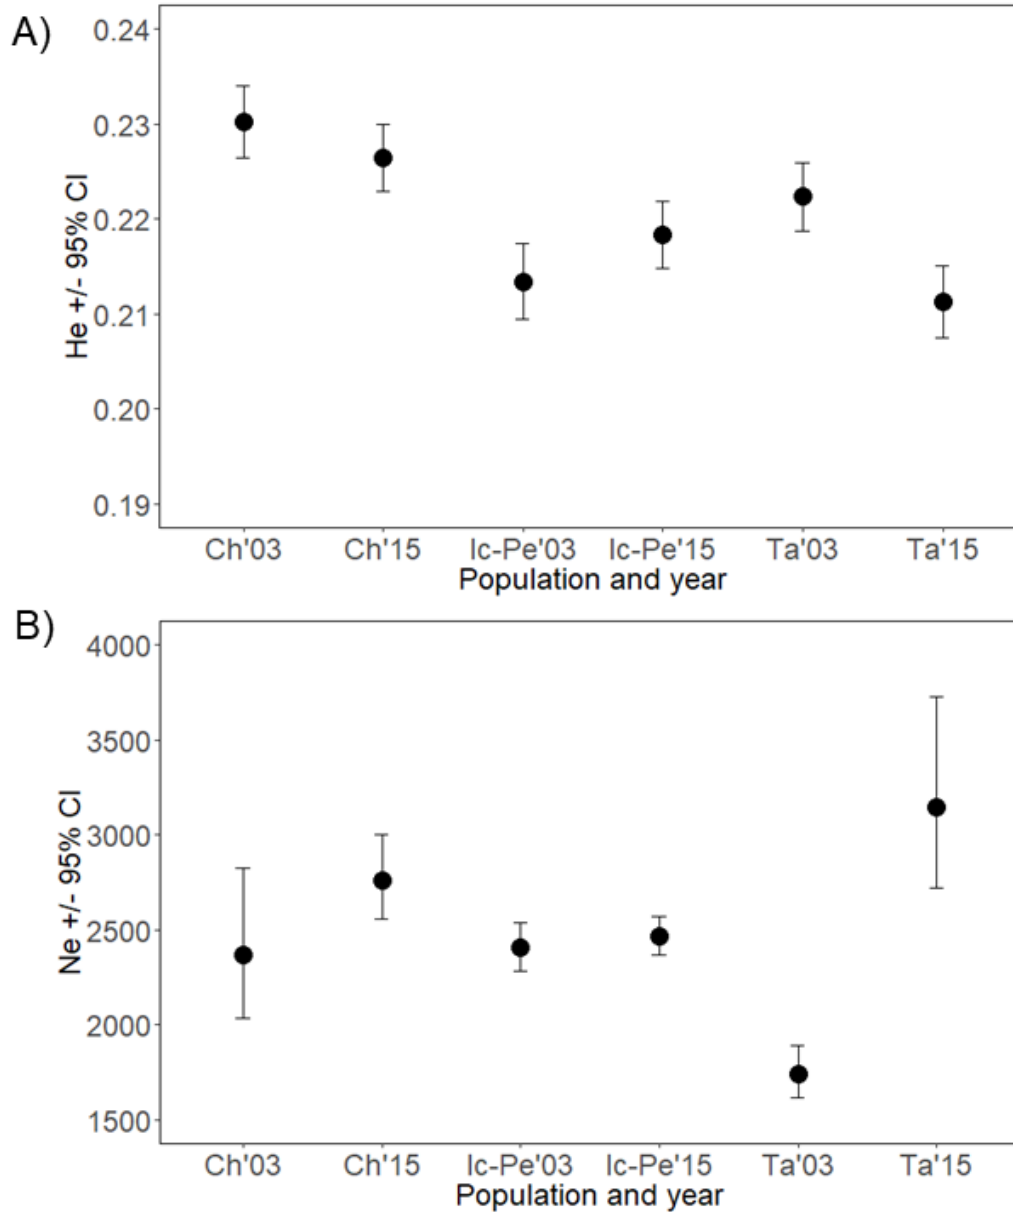

**Figure 3:** A) Expected heterozygosity ( $H_E$ )  $\pm$  95% CI and B) effective population size ( $N_E$ )  $\pm$  95% CI for walleye from each Chalifour (Ch), Icon-Perch (Ic-Pe) and Takwa (Ta) Rivers in each 2003 and 2015.

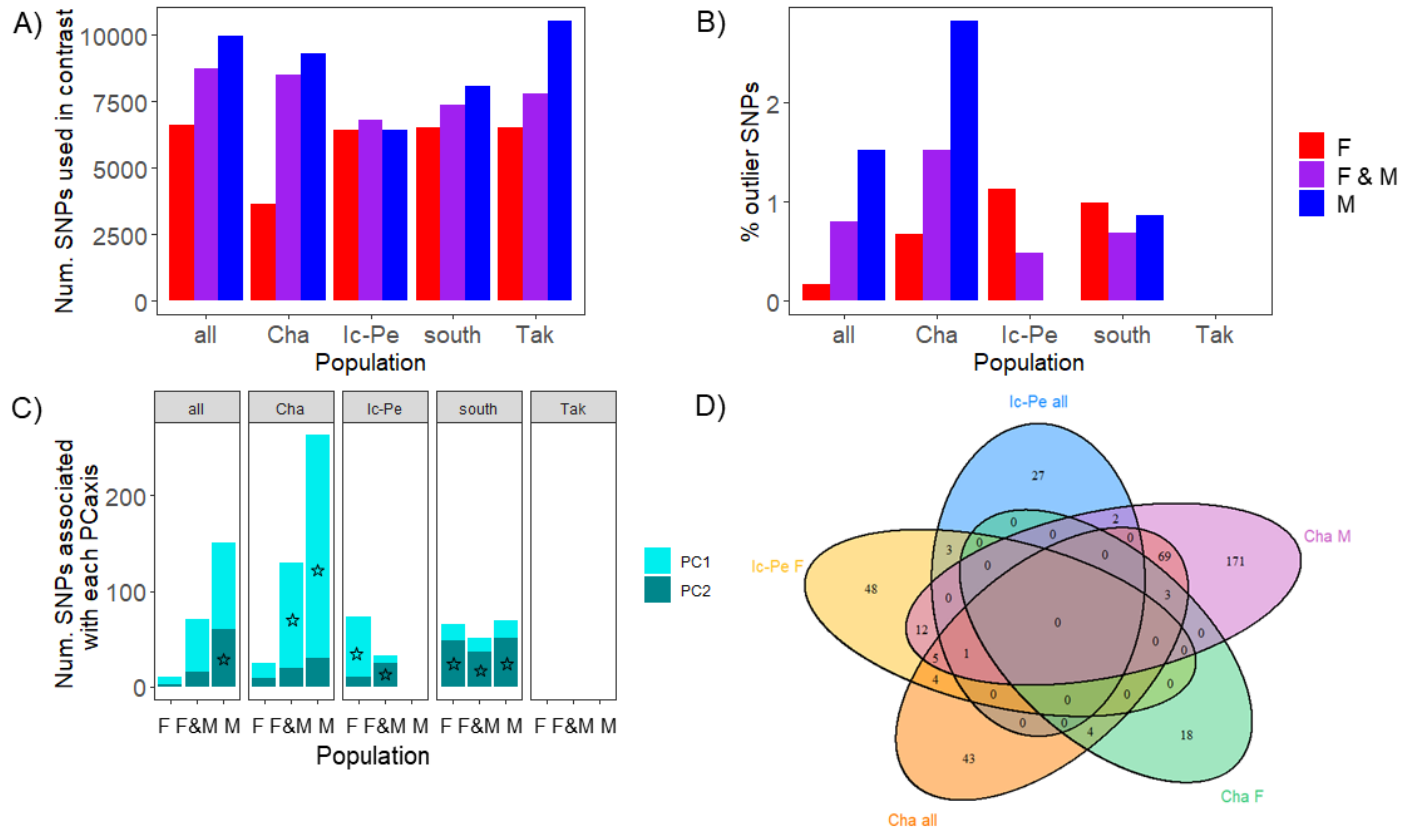

**Figure 4.** A) Total number of SNPs used in each between-year contrast (i.e., the number of SNPs used was unique for each sex and population). B) Percentage of SNPs that were outliers in each pairwise contrast. C) Number of outlier SNPs associated with each PCaxis. The star (★) denotes which PC axis separated years. Where there is no star on a bar population structure between years was not maintained by outlier loci. See Table S7 and Figures S2 – S16 for further explanations and detailed descriptions of how outliers on each PC axis maintained the observed population structure. Where no bars are shown (i.e., for Takwa and Icon-Perch m in % outlier SNPs and SNPs associated with each PCaxis) there was no population structure and thus no outlier loci between years. D) Outlier loci overlap between the southern populations.

#### Literature cited

- Abed A, L egar e G, Pomerleau S, *et al.* (2018) Genotyping-by-sequencing on the Ion Torrent platform in barley. In: *Methods in molecular biology*. Humana Press.
- Akaike H (1974) A new look at the statistical model identification. *IEEE Transactions on Automatic Control* **19**, 716-723.
- Alexander DH, Novembre J, Lange K (2009) Fast model-based estimation of ancestry in unrelated individuals. *Genome Research* **19**, 1655-1664.
- Allen BE, Bowles E, Morris MR, Rogers SM (2017) Loss of SNP genetic diversity following population collapse in a recreational walleye (*Sander vitreus*) fishery. *Canadian Journal of Fisheries and Aquatic Sciences*, 1-8.
- Allendorf FW, England PR, Luikart G, Ritchie PA, Ryman N (2008) Genetic effects of harvest on wild animal populations. *Trends in Ecology & Evolution* **23**, 327-337.
- Audzijonyte A, Kuparinen A (2016) The role of life histories and trophic interactions in population recovery. *Conservation Biology* **30**, 734-743.
- Berkes F, Colding J, Folke C (2000) Rediscovery of traditional ecological knowledge as adaptive management. *Ecological Applications* **10**, 1251-1262.
- Bernatchez L, Wellenreuther M, Araneda C, *et al.* (2017) Harnessing the power of genomics to secure the future of seafood. *Trends in Ecology & Evolution* **32**, 665-680.
- Bigrigg JL (2008) *Determining stream origin of four purported walleye stocks in Lake Erie using otolith elemental analysis*, The Ohio State University.
- Bozek MA, Baccante DA, Lester NP (2011) Walleye and sauger life history: Chapter 7. In: *Biology, Management and Culture of Walleye and Sauger* (ed. Barton BA). American Fisheries Society.
- Catchen J, Hohenlohe PA, Bassham S, Amores A, Cresko WA (2013) Stacks: an analysis tool set for population genomics. *Molecular Ecology* **22**, 3124-3140.
- Chang CC, Chow CC, Tellier LC, *et al.* (2015) Second-generation PLINK: rising to the challenge of larger and richer datasets. *Gigascience* **4**, 7.
- Chapman PM (2007) Traditional ecological knowledge (TEK) and scientific weight of evidence determinations. *Marine Pollution Bulletin* **54**, 1839-1840.
- Chebib J, Renaut S, Bernatchez L, Rogers SM (2016) Genetic structure and within-generation genome scan analysis of fisheries-induced evolution in a Lake Whitefish (*Coregonus clupeaformis*) population. *Conservation Genetics* **17**, 473-483.
- Conover DO, Duffy TA, Hice LA (2009) The covariance between genetic and environmental influences across ecological gradients. *Annals of the New York Academy of Sciences* **1168**, 100-129.
- Denwood MJ (2016) runjags: An R package providing interface utilities, model templates, parallel computing methods and additional distributions for MCMC models in JAGS. *Journal of statistical software* **71**, 1-25.
- Do C, Waples RS, Peel D, *et al.* (2014) NeEstimator v2: re-implementation of software for the estimation of contemporary effective population size ( $N_e$ ) from genetic data. *Molecular ecology resources* **14**, 209-214.
- Drew JA (2005) Use of traditional ecological knowledge in marine conservation. *Conservation Biology* **19**, 1286-1293.
- Dupont PP, Bourret V, Bernatchez L (2007) Interplay between ecological, behavioural and historical factors in shaping the genetic structure of sympatric walleye populations (*Sander vitreus*). *Molecular Ecology* **16**, 937-951.
- Enberg K, J orgensen C, Dunlop ES, *et al.* (2012) Fishing-induced evolution of growth: concepts, mechanisms and the empirical evidence. *Marine Ecology* **33**, 1-25.

- Faust MD, Scholten G (2017) Cleithra, densities, and other bones. In: *Age and growth of fishes: Principles and Techniques* (eds. Quist MC, Isermann DA), pp. 159-171. American Fisheries Society, Bethesda, Maryland.
- Feiner ZS, Chong SC, Knight CT, *et al.* (2015) Rapidly shifting maturation schedules following reduced commercial harvest in a freshwater fish. *Evolutionary applications* **8**, 724-737.
- Flanagan SP, Forester BR, Latch EK, Aitken SN, Hoban S (2018) Guidelines for planning genomic assessment and monitoring of locally adaptive variation to inform species conservation. *Evolutionary applications* **11**, 1035-1052.
- Fraser DJ, Coon T, Prince MR, Dion R, Bernatchez L (2006) Integrating traditional and evolutionary knowledge in biodiversity conservation: a population level case study. *Ecology and Society* **11**, 4.
- Fraser DJ, Walker L, Yates MC, *et al.* (2018) Population correlates of rapid captive-induced maladaptation in a wild fish. *Evolutionary applications*.
- Gagnon C, Berteaux D (2009) Integrating traditional ecological knowledge and ecological science: a question of scale. *Ecology and Society* **14**.
- Geisler M (2012) *Stock assessment of walleye (Sander vitreus) in waterhen lake*, MB Honours thesis, University of Winnipeg.
- Gelman A, Stern HS, Carlin JB, *et al.* (2013) *Bayesian data analysis* Chapman and Hall/CRC.
- Götz S, García-Gómez JM, Terol J, *et al.* (2008) High-throughput functional annotation and data mining with the Blast2GO suite. *Nucleic Acids Research* **36**, 3420-3435.
- Hansen GJ, Carpenter SR, Gaeta JW, Hennessy JM, Vander Zanden MJ (2015) Predicting walleye recruitment as a tool for prioritizing management actions. *Canadian Journal of Fisheries and Aquatic Sciences* **72**, 661-672.
- Hansen MJ, Bozek MA, Newby JR, Newman SP, Staggs MD (1998) Factors affecting recruitment of walleyes in Escanaba Lake, Wisconsin, 1958–1996. *North American Journal of Fisheries Management* **18**, 764-774.
- Heino M, Baulier L, Boukal DS, *et al.* (2013) Can fisheries-induced evolution shift reference points for fisheries management? *ICES Journal of Marine Science* **70**, 707-721.
- Heino M, Godø OR (2002) Fisheries-induced selection pressures in the context of sustainable fisheries. *Bulletin of Marine Science* **70**, 639-656.
- Heino M, Pauli BD, Dieckmann U (2015) Fisheries-induced evolution. *Annual Review of Ecology, Evolution, and Systematics* **46**.
- Hermisson J (2005) Soft Sweeps: Molecular Population Genetics of Adaptation From Standing Genetic Variation. *Genetics* **169**, 2335-2352.
- Hixon MA, Johnson DW, Sogard SM (2013) BOFFFFs: on the importance of conserving old-growth age structure in fishery populations. *ICES Journal of Marine Science* **71**, 2171-2185.
- Huntington HP (2011) Arctic science: The local perspective. *Nature* **478**, 182-183.
- Hutchings JA (2005) Life history consequences of overexploitation to population recovery in Northwest Atlantic cod (*Gadus morhua*). *Canadian Journal of Fisheries and Aquatic Sciences* **62**, 824-832.
- Hutchings JA, Fraser DJ (2008) The nature of fisheries-and farming-induced evolution. *Molecular Ecology* **17**, 294-313.
- Hutchings JA, Rowe S (2008) Consequences of sexual selection for fisheries-induced evolution: an exploratory analysis. *Evolutionary applications* **1**, 129-136.
- Hutchinson WF, van Oosterhout C, Rogers SI, Carvalho GR (2003) Temporal analysis of archived samples indicates marked genetic changes in declining North Sea cod (*Gadus morhua*). *Proceedings of the Royal Society of London B: Biological Sciences* **270**, 2125-2132.
- Jackson DA (1993) Stopping rules in principal components analysis: a comparison of heuristical and statistical approaches. *Ecology* **74**, 2204-2214.
- Jombart T (2008) adegenet: a R package for the multivariate analysis of genetic markers. *Bioinformatics* **24**, 1403-1405.
- Jombart T, Devillard S, Balloux F (2010) Discriminant analysis of principal components: a new method for the analysis of genetically structured populations. *BMC Genetics* **11**, 94.



- Jorgensen C, Enberg K, Dunlop ES, *et al.* (2007) Ecology-Managing evolving fish stocks. *Science* **318**, 1247-1248.
- Kitchell JF, Johnson MG, Minns CK, *et al.* (1977) Percid habitat: the river analogy. *Journal of the Fisheries Board of Canada* **34**, 1936-1940.
- Law R (2000) Fishing, selection, and phenotypic evolution. *ICES Journal of Marine Science* **57**, 659-668.
- Law R (2007) Fisheries-induced evolution: present status and future directions. *Marine Ecology Progress Series* **335**, 271-277.
- Law R, Grey DR (1989) Evolution of yields from populations with age-specific cropping. *Evolutionary Ecology* **3**, 343-359.
- Luu K, Bazin E, Blum MG (2017) pcadapt: an R package to perform genome scans for selection based on principal component analysis. *Molecular ecology resources* **17**, 67-77.
- Marin K, Coon A, Fraser DJ (2017) Traditional Ecological Knowledge reveals the extent of sympatric lake trout diversity and habitat preferences. *Ecology and Society* **22**, 20.
- Martin M (2011) Cutadapt removes adapter sequences from highthroughput sequencing reads. *EMBnet. journal* **17**: 10–12.
- Mascher M, Wu S, Amand PS, Stein N, Poland J (2013) Application of genotyping-by-sequencing on semiconductor sequencing platforms: a comparison of genetic and reference-based marker ordering in barley. *PLoS One* **8**, e76925.
- Mastretta-Yanes A, Arrigo N, Alvarez N, *et al.* (2015) Restriction site-associated DNA sequencing, genotyping error estimation and de novo assembly optimization for population genetic inference. *Molecular ecology resources* **15**, 28-41.
- Meirmans PG, Van Tienderen PH (2004) Genotype and Genodive: two programs for the analysis of genetic diversity of asexual organisms. *Molecular Ecology Notes* **4**, 792-794.
- Messer PW, Petrov DA (2013) Population genomics of rapid adaptation by soft selective sweeps. *Trends in Ecology & Evolution* **28**, 659-669.
- Neuheimer AB, Taggart CT (2007) The growing degree-day and fish size-at-age: the overlooked metric. *Canadian Journal of Fisheries and Aquatic Sciences* **64**, 375-385.
- Niemuth W, Churchhill W, Wirth T (1972) Walleye, its life history, ecology, and management. Wisconsin Department of Natural Resources, Wisconsin, Madison.
- Nunziata SO, Weisrock DW (2018) Estimation of contemporary effective population size and population declines using RAD sequence data. *Heredity* **120**, 196.
- Nussle S, Bornand CN, Wedekind C (2009) Fishery-induced selection on an Alpine whitefish: quantifying genetic and environmental effects on individual growth rate. *Evolutionary applications* **2**, 200-208.
- Oke KB, Rolshausen G, LeBlond C, Hendry AP (2017) How parallel is parallel evolution? A comparative analysis in fishes. *The American Naturalist* **190**, 1-16.
- Philipp DP, Claussen JE, Koppelman JB, *et al.* (2015) Fisheries-induced evolution in largemouth bass: linking vulnerability to angling, parental care, and fitness **82**, 223-234.
- Plummer M (2003) JAGS: A program for analysis of Bayesian graphical models using Gibbs sampling **124**.
- Polfus J, Manseau M, Simmons D, *et al.* (2016) Łeghągots' enetę (learning together): the importance of indigenous perspectives in the identification of biological variation. *Ecology and Society* **21**.
- Polfus JL, Heinemeyer K, Hebblewhite M (2014) Comparing traditional ecological knowledge and western science woodland caribou habitat models. *The Journal of wildlife management* **78**, 112-121.
- R Core Team (2017) R: A language and environment for statistical computing (ed. Computing RfCs), Vienna, Austria.
- Rowell CA (1993) The effects of fishing on the timing of maturity in North Sea cod (*Gadus morhua* L.). In: *The exploitation of evolving resources*, pp. 44-61. Springer.
- Scott WB, Crossman EJ (1979) *Freshwater fishes of Canada* Fisheries Research Board of Canada, Ottawa.

- Sharpe DM, Hendry AP (2009) SYNTHESIS: life history change in commercially exploited fish stocks: an analysis of trends across studies. *Evolutionary applications* **2**, 260-275.
- Swain DP, Sinclair AF, Hanson JM (2007) Evolutionary response to size-selective mortality in an exploited fish population. *Proceedings of the Royal Society of London B: Biological Sciences* **274**, 1015-1022.
- Therkildsen NO, Hemmer-Hansen J, Als TD, *et al.* (2013) Microevolution in time and space: SNP analysis of historical DNA reveals dynamic signatures of selection in Atlantic cod. *Molecular Ecology* **22**, 2424-2440.
- Therkildsen NO, Wilder AP, Conover DO, *et al.* (2019) Contrasting genomic shifts underlie parallel phenotypic evolution in response to fishing. *Science* **365**, 487-490.
- Uusi-Heikkilä S, Sävilammi T, Leder E, Arlinghaus R, Primmer CR (2017) Rapid, broad-scale gene expression evolution in experimentally harvested fish populations. *Molecular Ecology* **26**, 3954-3967.
- van Wijk SJ, Taylor MI, Creer S, *et al.* (2013) Experimental harvesting of fish populations drives genetically based shifts in body size and maturation. *Frontiers in Ecology and the Environment* **11**, 181-187.
- Venturelli PA, Lester NP, Marshall TR, Shuter BJ (2010) Consistent patterns of maturity and density-dependent growth among populations of walleye (*Sander vitreus*): application of the growing degree-day metric. *Canadian Journal of Fisheries and Aquatic Sciences* **67**, 1057-1067.
- Waples RK, Larson WA, Waples RS (2016) Estimating contemporary effective population size in non-model species using linkage disequilibrium across thousands of loci. *Heredity* **117**, 233-240.
- Waples RS, Do C (2010) Linkage disequilibrium estimates of contemporary Ne using highly variable genetic markers: a largely untapped resource for applied conservation and evolution. *Evolutionary applications* **3**, 244-262.
- Weir BS, Cockerham CC (1984) Estimating F-statistics for the analysis of population structure. *Evolution* **38**, 1358-1370.
